# Supplementary material
Source: Springer Nature journal article supplement (https://www.springermedizin.de/resource/supplementary/12891_2009_727_MOESM3_ESM.pdf/9506274)

**Figure 2: Overview of the 12 week comprehensive exercise program**

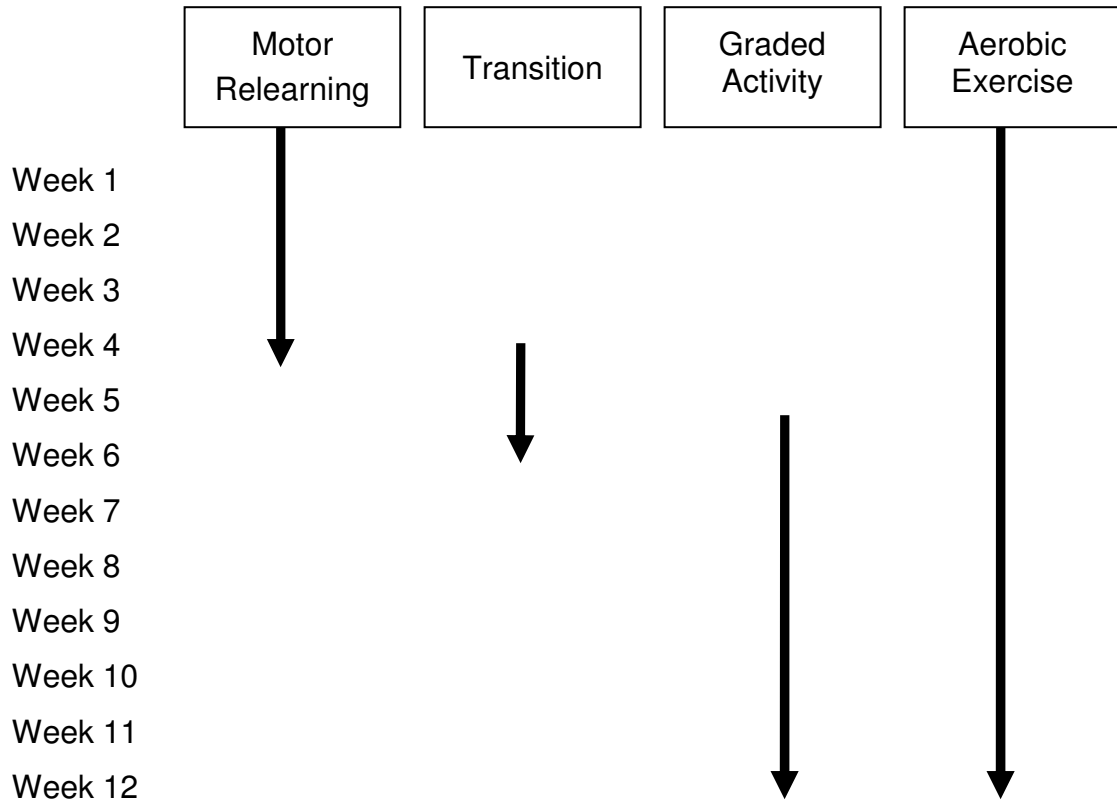

Supplement: MOESM3 [file 9506274]
